# Supplementary material
Source: PubMed Central journal article supplement (PMC4423365)
Supplement: 10.1534_115.175596_genetics.115.175596-3.pdf [file 10.1534_115.175596_genetics.115.175596-3.pdf]

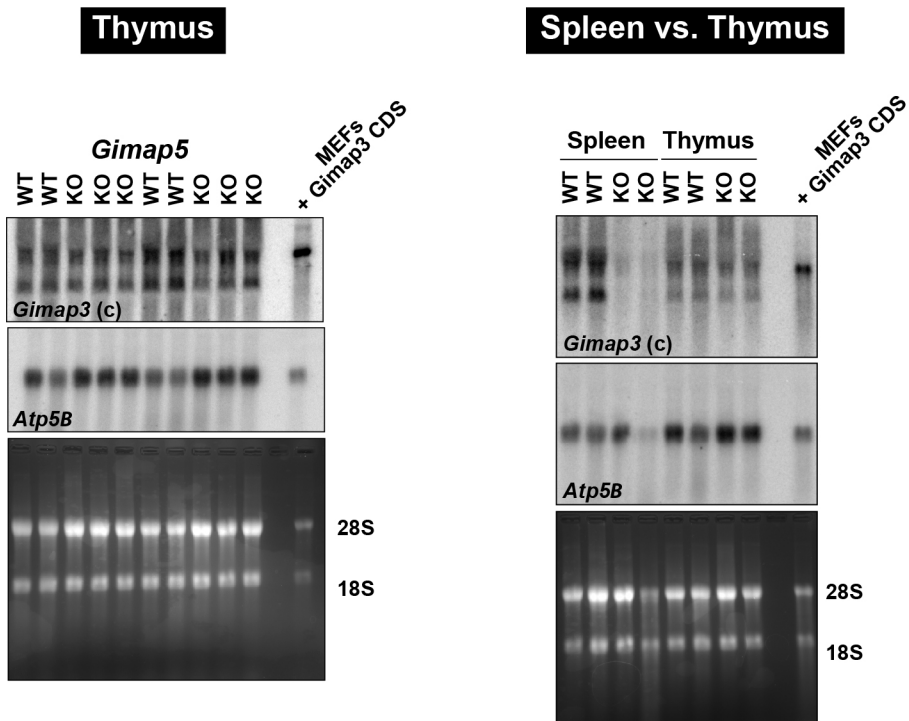

**Figure S3 : Northern blotting of Gimap3 in spleen and thymus of Gimap5 wildtype and knockout mice.**

15 ug of total RNA from each tissues and 5 ug for the cell line control was separated on formaldehyde gel and transferred to a charged nylon membrane followed by U.V. cross-linking. Oligonucleotide probes were end-labeled with  $^{32}\text{P}$ -ATP then hybridized overnight with the membrane.
