# Supplementary material
Source: PubMed Central journal article supplement (PMC4423365)
Supplement: 10.1534_115.175596_genetics.115.175596-4.pdf [file 10.1534_115.175596_genetics.115.175596-4.pdf]

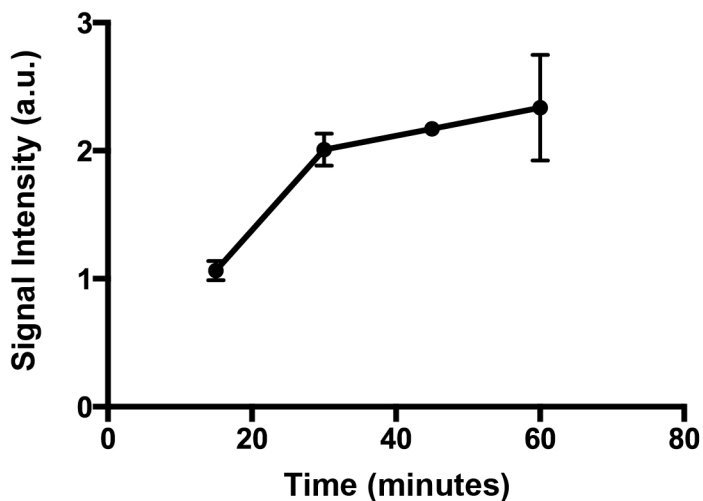

**Figure S2: Quantification of  $^{35}\text{S}$ -Met, Cys *in vitro* incorporation into YFP.** YFP was produced in a coupled T7 reticulocyte lysate *in vitro* expression assay then separated by SDS-PAGE. The gel was dried, incubated with a phospho screen and signal intensity quantified following scanning with a Typhoon imaging station. Each time point represents a mean ( $\pm$  S.D.) of three independent experiments.
