# Supplementary material
Source: PubMed Central journal article supplement (PMC4423365)
Supplement: 10.1534_115.175596_genetics.115.175596-6.pdf [file 10.1534_115.175596_genetics.115.175596-6.pdf]

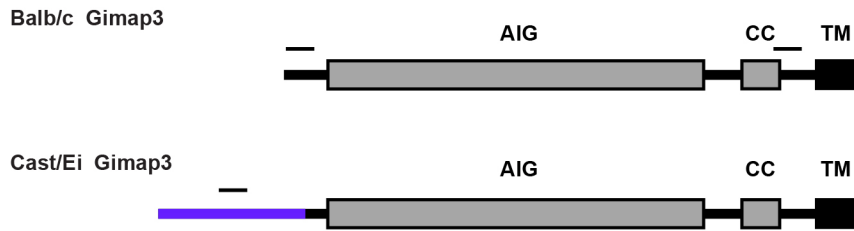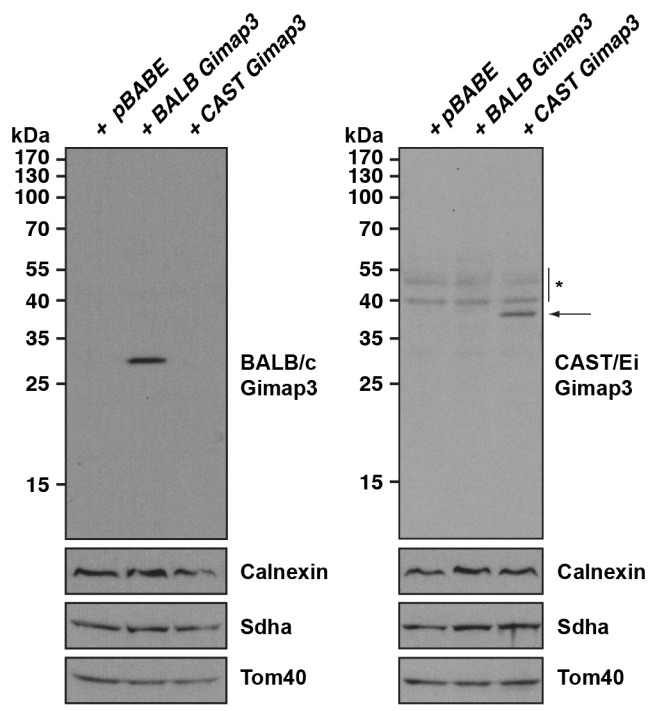

**Figure S1: Validation of Gimap3 allele-specific polyclonal antibodies.**

Upper panel, a graphical illustration of the Gimap3 protein for the BALB/c and CAST/Ei allelic variants. Black lines above the protein represent location of peptide sequences used for generating polyclonal antibodies. CC = coiled-coil; TM = transmembrane domain. Blue in the CAST/Ei protein indicates unique polypeptide sequence compared to the BALB/c allele. Lower panel, immunoblotting of whole cell lysates from retrovirally transduced mouse embryonic fibroblasts with the indicated cDNAs and antibodies.

\* non-specific signal detected in mouse embryonic fibroblasts.
